# Supplementary material
Source: PubMed Central journal article supplement (PMC2626739)
Supplement: 0811271106_0811271106SI.pdf [file 0811271106_0811271106SI.pdf]

# Supporting Information

Wahl *et al.* 10.1073/pnas.0811271106

## SI Text

### Influenza PR8 Infection of Mice

Six-week-old male and female HLA-B\*0702 transgenic H-2K<sup>b</sup>D<sup>b</sup> double-knockout C57BL/6 mice (obtained from the laboratory of Dr. Francois Lemonnier at the Institut Pasteur) were inoculated intranasally with 1000 EID<sub>50</sub> mouse-adapted Influenza PR8 (kindly provided by the laboratory of Dr. David Woodland at the Trudeau Institute) or sterile endotoxin free saline (mock infection) at volume of 10  $\mu$ l per nostril. Mice were monitored daily for weight loss. Splenocytes were harvested 12 days post infection, passed through a cell strainer and lymphocytes isolated by centrifuging cells over a lympholyte-M density gradient (Cedar Lane). Lymphocytes were stored at -180°C in 90% FBS 10% DMSO.

Lymphocytes were measured for peptide specific interferon gamma secretion via ELISPOT. Briefly, 10<sup>5</sup> lymphocytes were incubated with 10  $\mu$ g/ml synthetic influenza peptide, 10  $\mu$ g/ml synthetic HIV-NEF peptide RPMTYKAAL (negative control), and 4  $\mu$ g/ml concanavalin A (positive control) in RPMI 1640 media for 24 hr at 37°C in triplicate wells of a 96-well PVDF membrane-bottomed plate coated with anti-IFN $\gamma$  antibody (Cell Sciences). The assay was performed according to manufacturer's instructions. The number of IFN $\gamma$  produced spots per well was enumerated with a Zeiss KS ELISPOT reader. Wells with greater than 2.6 standard deviations (SD) the number of spots produced in wells with only media and 10<sup>5</sup> lymphocytes were scored positive. Wells with greater than 2.6 SD SFU have a confidence level  $\geq 99\%$  ( $\mu = x \pm (Z\sigma)/\sqrt{N}$ ). The data generated are illustrated as spot forming units (SFU) per 10<sup>5</sup> lymphocytes.





Table S1. Nucleoprotein 418–426 peptide sequences in human influenza A H1N1 and H3N2 strains

| 1 | 2 | 3 | 4 | 5 | 6 | 7 | 8 | 9 | Influenza strain |
|---|---|---|---|---|---|---|---|---|------------------|
| L | P | F | D | R | T | T | V | M | H1N1             |
| – | – | – | – | K | – | – | I | – | H1N1             |
| – | – | – | – | – | P | – | I | – | H1N1             |
| – | – | – | – | K | A | – | I | – | H1N1             |
| – | – | – | E | K | – | – | I | – | H1N1             |
| – | – | – | E | – | S | – | I | – | H1N1             |
| – | – | – | – | K | I | – | I | – | H1N1             |
| – | – | – | E | – | A | – | I | – | H1N1             |
| – | – | – | G | K | – | – | I | – | H1N1             |
| – | – | – | – | – | – | – | I | – | H1N1/H3N2        |
| – | – | – | – | K | S | – | I | – | H1N1/H3N2        |
| – | – | – | – | K | S | – | – | – | H1N1/H3N2        |
| – | – | – | E | – | A | – | – | – | H1N1/H3N2        |
| – | – | – | – | K | P | – | I | – | H3N2             |
| – | – | – | E | – | S | – | – | – | H3N2             |
| – | – | – | E | K | S | – | I | – | H3N2             |
| – | – | – | E | K | S | – | – | – | H3N2             |
| – | – | – | – | K | Q | – | I | – | H3N2             |
| – | – | – | E | K | S | I | – | – | H3N2             |
| – | – | – | E | – | A | – | I | I | H3N2             |
| – | – | – | E | K | P | – | – | – | H3N2             |
